# Supplementary material for: Modeling Within-Host Dynamics of SARS-CoV-2 Infection: A Case Study in Ferrets
Source: MDPI journal article supplement (doi:10.3390/v13081635), 2021-08-18
Supplement: s1 [file s1]

**Table S1.** Pearson Correlation Coefficient of Estimated Parameters from Replicates by Bootstrapping the Residuals.

**Model 1**

Animal F13-E-1

|           | $\beta$ | $\delta$ | $\alpha$ | $p$   | $c$   | $V_{i()}$ |
|-----------|---------|----------|----------|-------|-------|-----------|
| $\beta$   | 1.00    | -0.06    | 0.09     | -0.11 | 0.16  | 0.03      |
| $\delta$  | -0.06   | 1.00     | -0.37    | 0.35  | -0.50 | -0.30     |
| $\alpha$  | 0.09    | -0.37    | 1.00     | -0.30 | 0.74  | 0.44      |
| $p$       | -0.11   | 0.35     | -0.30    | 1.00  | -0.04 | -0.31     |
| $c$       | 0.16    | -0.50    | 0.74     | -0.04 | 1.00  | 0.40      |
| $V_{i()}$ | 0.03    | -0.30    | 0.44     | -0.31 | 0.40  | 1.00      |

Animal F13-E-2

|           | $\beta$ | $\delta$ | $\alpha$ | $p$   | $c$   | $V_{i()}$ |
|-----------|---------|----------|----------|-------|-------|-----------|
| $\beta$   | 1.00    | -0.21    | 0.04     | -0.34 | 0.00  | -0.01     |
| $\delta$  | -0.21   | 1.00     | -0.38    | 0.36  | -0.47 | -0.15     |
| $\alpha$  | 0.04    | -0.38    | 1.00     | -0.33 | 0.68  | 0.12      |
| $p$       | -0.34   | 0.36     | -0.33    | 1.00  | 0.04  | -0.12     |
| $c$       | 0.00    | -0.47    | 0.68     | 0.04  | 1.00  | 0.14      |
| $V_{i()}$ | -0.01   | -0.15    | 0.12     | -0.12 | 0.14  | 1.00      |

Animal F13-E-3

|           | $\beta$ | $\delta$ | $\alpha$ | $p$   | $c$   | $V_{i()}$ |
|-----------|---------|----------|----------|-------|-------|-----------|
| $\beta$   | 1.00    | -0.04    | -0.14    | 0.03  | 0.01  | -0.08     |
| $\delta$  | -0.04   | 1.00     | -0.31    | 0.27  | -0.45 | 0.07      |
| $\alpha$  | -0.14   | -0.31    | 1.00     | -0.22 | 0.51  | -0.05     |
| $p$       | 0.03    | 0.27     | -0.22    | 1.00  | 0.15  | -0.15     |
| $c$       | 0.01    | -0.45    | 0.51     | 0.15  | 1.00  | 0.03      |
| $V_{i()}$ | -0.08   | 0.07     | -0.05    | -0.15 | 0.03  | 1.00      |

Animal Ctan-H-1

|           | $\beta$ | $\delta$ | $\alpha$ | $p$   | $c$   | $V_{i()}$ |
|-----------|---------|----------|----------|-------|-------|-----------|
| $\beta$   | 1.00    | 0.07     | 0.01     | 0.05  | 0.22  | 0.12      |
| $\delta$  | 0.07    | 1.00     | -0.29    | 0.20  | -0.46 | -0.30     |
| $\alpha$  | 0.01    | -0.29    | 1.00     | -0.20 | 0.58  | 0.34      |
| $p$       | 0.05    | 0.20     | -0.20    | 1.00  | 0.04  | -0.29     |
| $c$       | 0.22    | -0.46    | 0.58     | 0.04  | 1.00  | 0.32      |
| $V_{i()}$ | 0.12    | -0.30    | 0.34     | -0.29 | 0.32  | 1.00      |

Animal Ctan-H-

| <u>2</u> | $\beta$ | $\delta$ | $\alpha$ | $p$   | $c$   | $V_{i(}$ |
|----------|---------|----------|----------|-------|-------|----------|
| $\beta$  | 1.00    | 0.09     | -0.24    | 0.01  | -0.19 | -0.01    |
| $\delta$ | 0.09    | 1.00     | -0.40    | 0.54  | -0.49 | -0.05    |
| $\alpha$ | -0.24   | -0.40    | 1.00     | -0.30 | 0.60  | -0.07    |
| $p$      | 0.01    | 0.54     | -0.30    | 1.00  | 0.05  | -0.03    |
| $c$      | -0.19   | -0.49    | 0.60     | 0.05  | 1.00  | 0.08     |
| $V_{i(}$ | -0.01   | -0.05    | -0.07    | -0.03 | 0.08  | 1.00     |

Animal Ctan-H-

| <u>3</u> | $\beta$ | $\delta$ | $\alpha$ | $p$   | $c$   | $V_{i(}$ |
|----------|---------|----------|----------|-------|-------|----------|
| $\beta$  | 1.00    | 0.29     | -0.51    | 0.36  | -0.18 | 0.09     |
| $\delta$ | 0.29    | 1.00     | -0.38    | 0.28  | -0.49 | -0.02    |
| $\alpha$ | -0.51   | -0.38    | 1.00     | -0.29 | 0.53  | -0.06    |
| $p$      | 0.36    | 0.28     | -0.29    | 1.00  | 0.11  | -0.03    |
| $c$      | -0.18   | -0.49    | 0.53     | 0.11  | 1.00  | -0.03    |
| $V_{i(}$ | 0.09    | -0.02    | -0.06    | -0.03 | -0.03 | 1.00     |

**Model 2**Animal F13-E-1

|          | $\beta$ | $\delta$ | $\alpha$ | $p$   | $c$   | $k$   | $V_{i(}$ |
|----------|---------|----------|----------|-------|-------|-------|----------|
| $\beta$  | 1.00    | -0.22    | -0.48    | -0.02 | -0.03 | 0.30  | -0.19    |
| $\delta$ | -0.22   | 1.00     | 0.20     | -0.08 | -0.32 | -0.36 | 0.14     |
| $\alpha$ | -0.48   | 0.20     | 1.00     | -0.19 | 0.16  | -0.04 | 0.20     |
| $p$      | -0.02   | -0.08    | -0.19    | 1.00  | 0.07  | -0.15 | -0.11    |
| $c$      | -0.03   | -0.32    | 0.16     | 0.07  | 1.00  | 0.20  | 0.13     |
| $k$      | 0.30    | -0.36    | -0.04    | -0.15 | 0.20  | 1.00  | -0.03    |
| $V_{i(}$ | -0.19   | 0.14     | 0.20     | -0.11 | 0.13  | -0.03 | 1.00     |

Animal F13-E-2

|          | $\beta$ | $\delta$ | $\alpha$ | $p$   | $c$   | $k$   | $V_{i(}$ |
|----------|---------|----------|----------|-------|-------|-------|----------|
| $\beta$  | 1.00    | -0.18    | -0.49    | -0.17 | -0.09 | -0.10 | -0.18    |
| $\delta$ | -0.18   | 1.00     | 0.24     | 0.01  | -0.32 | -0.17 | -0.03    |
| $\alpha$ | -0.49   | 0.24     | 1.00     | -0.16 | 0.14  | 0.16  | 0.06     |
| $p$      | -0.17   | 0.01     | -0.16    | 1.00  | 0.12  | 0.07  | -0.10    |
| $c$      | -0.09   | -0.32    | 0.14     | 0.12  | 1.00  | 0.29  | 0.13     |
| $k$      | -0.10   | -0.17    | 0.16     | 0.07  | 0.29  | 1.00  | -0.02    |
| $V_{i(}$ | -0.18   | -0.03    | 0.06     | -0.10 | 0.13  | -0.02 | 1.00     |

Animal F13-E-3

|          | $\beta$ | $\delta$ | $\alpha$ | $p$   | $c$   | $k$   | $V_{i(}$ |
|----------|---------|----------|----------|-------|-------|-------|----------|
| $\beta$  | 1.00    | -0.24    | -0.52    | 0.06  | 0.12  | -0.11 | -0.31    |
| $\delta$ | -0.24   | 1.00     | 0.17     | -0.09 | -0.42 | 0.28  | 0.13     |
| $\alpha$ | -0.52   | 0.17     | 1.00     | -0.27 | 0.06  | 0.09  | 0.10     |
| $p$      | 0.06    | -0.09    | -0.27    | 1.00  | 0.21  | 0.11  | -0.14    |
| $c$      | 0.12    | -0.42    | 0.06     | 0.21  | 1.00  | 0.11  | -0.06    |
| $k$      | -0.11   | 0.28     | 0.09     | 0.11  | 0.11  | 1.00  | 0.12     |
| $V_{i(}$ | -0.31   | 0.13     | 0.10     | -0.14 | -0.06 | 0.12  | 1.00     |

Animal CTan-H-1

|          | $\beta$ | $\delta$ | $\alpha$ | $p$   | $c$   | $k$   | $V_{i(}$ |
|----------|---------|----------|----------|-------|-------|-------|----------|
| $\beta$  | 1.00    | -0.04    | -0.24    | -0.10 | 0.17  | -0.15 | -0.15    |
| $\delta$ | -0.04   | 1.00     | 0.10     | -0.06 | -0.15 | 0.07  | 0.17     |
| $\alpha$ | -0.24   | 0.10     | 1.00     | -0.07 | -0.06 | 0.03  | 0.43     |
| $p$      | -0.10   | -0.06    | -0.07    | 1.00  | 0.02  | 0.02  | -0.03    |
| $c$      | 0.17    | -0.15    | -0.06    | 0.02  | 1.00  | -0.02 | -0.03    |
| $k$      | -0.15   | 0.07     | 0.03     | 0.02  | -0.02 | 1.00  | 0.34     |
| $V_{i(}$ | -0.15   | 0.17     | 0.43     | -0.03 | -0.03 | 0.34  | 1.00     |

Animal CTan-H-2

|          | $\beta$ | $\delta$ | $\alpha$ | $p$   | $c$   | $k$   | $V_{i(}$ |
|----------|---------|----------|----------|-------|-------|-------|----------|
| $\beta$  | 1.00    | -0.30    | 0.19     | -0.14 | 0.12  | -0.30 | -0.26    |
| $\delta$ | -0.30   | 1.00     | 0.18     | -0.17 | -0.42 | 0.44  | 0.28     |
| $\alpha$ | 0.19    | 0.18     | 1.00     | -0.16 | -0.11 | 0.13  | 0.16     |
| $p$      | -0.14   | -0.17    | -0.16    | 1.00  | 0.28  | 0.04  | -0.15    |
| $c$      | 0.12    | -0.42    | -0.11    | 0.28  | 1.00  | -0.03 | -0.10    |
| $k$      | -0.30   | 0.44     | 0.13     | 0.04  | -0.03 | 1.00  | 0.36     |
| $V_{i(}$ | -0.26   | 0.28     | 0.16     | -0.15 | -0.10 | 0.36  | 1.00     |

Animal CTan-H-3

|          | $\beta$ | $\delta$ | $\alpha$ | $p$   | $c$   | $k$   | $V_{i(}$ |
|----------|---------|----------|----------|-------|-------|-------|----------|
| $\beta$  | 1.00    | -0.04    | -0.53    | 0.11  | 0.12  | 0.24  | -0.22    |
| $\delta$ | -0.04   | 1.00     | 0.02     | 0.01  | -0.36 | -0.14 | 0.28     |
| $\alpha$ | -0.53   | 0.02     | 1.00     | -0.07 | 0.31  | -0.28 | 0.09     |
| $p$      | 0.11    | 0.01     | -0.07    | 1.00  | 0.38  | 0.06  | -0.09    |
| $c$      | 0.12    | -0.36    | 0.31     | 0.38  | 1.00  | 0.16  | -0.04    |
| $k$      | 0.24    | -0.14    | -0.28    | 0.06  | 0.16  | 1.00  | 0.05     |
| $V_{i(}$ | -0.22   | 0.28     | 0.09     | -0.09 | -0.04 | 0.05  | 1.00     |

### Model 3

#### Animal F13-E-1

|          | $\beta$ | $\delta$ | $\alpha$ | $p$   | $c$   | $\sigma$ | $V_{i(}$ |
|----------|---------|----------|----------|-------|-------|----------|----------|
| $\beta$  | 1.00    | -0.28    | -0.45    | 0.00  | 0.27  | -0.15    | -0.25    |
| $\delta$ | -0.28   | 1.00     | 0.24     | -0.05 | -0.28 | -0.04    | 0.08     |
| $\alpha$ | -0.45   | 0.24     | 1.00     | -0.13 | 0.15  | 0.09     | 0.09     |
| $p$      | 0.00    | -0.05    | -0.13    | 1.00  | -0.02 | -0.06    | -0.10    |
| $c$      | 0.27    | -0.28    | 0.15     | -0.02 | 1.00  | -0.19    | -0.04    |
| $\sigma$ | -0.15   | -0.04    | 0.09     | -0.06 | -0.19 | 1.00     | 0.18     |
| $V_{i(}$ | -0.25   | 0.08     | 0.09     | -0.10 | -0.04 | 0.18     | 1.00     |

#### Animal F13-E-2

|          | $\beta$ | $\delta$ | $\alpha$ | $p$   | $c$   | $\sigma$ | $V_{i(}$ |
|----------|---------|----------|----------|-------|-------|----------|----------|
| $\beta$  | 1.00    | -0.35    | -0.54    | -0.04 | 0.10  | -0.24    | -0.21    |
| $\delta$ | -0.35   | 1.00     | 0.35     | 0.10  | -0.31 | 0.04     | 0.08     |
| $\alpha$ | -0.54   | 0.35     | 1.00     | -0.18 | 0.07  | 0.20     | 0.05     |
| $p$      | -0.04   | 0.10     | -0.18    | 1.00  | 0.13  | -0.01    | -0.14    |
| $c$      | 0.10    | -0.31    | 0.07     | 0.13  | 1.00  | -0.38    | -0.05    |
| $\sigma$ | -0.24   | 0.04     | 0.20     | -0.01 | -0.38 | 1.00     | 0.00     |
| $V_{i(}$ | -0.21   | 0.08     | 0.05     | -0.14 | -0.05 | 0.00     | 1.00     |

#### Animal F13-E-3

|          | $\beta$ | $\delta$ | $\alpha$ | $p$   | $c$   | $\sigma$ | $V_{i(}$ |
|----------|---------|----------|----------|-------|-------|----------|----------|
| $\beta$  | 1.00    | -0.23    | -0.40    | -0.01 | 0.39  | -0.31    | -0.12    |
| $\delta$ | -0.23   | 1.00     | 0.16     | 0.10  | -0.39 | 0.02     | -0.11    |
| $\alpha$ | -0.40   | 0.16     | 1.00     | -0.06 | 0.42  | 0.06     | 0.01     |
| $p$      | -0.01   | 0.10     | -0.06    | 1.00  | -0.06 | 0.21     | -0.46    |
| $c$      | 0.39    | -0.39    | 0.42     | -0.06 | 1.00  | -0.28    | 0.04     |
| $\sigma$ | -0.31   | 0.02     | 0.06     | 0.21  | -0.28 | 1.00     | -0.11    |
| $V_{i(}$ | -0.12   | -0.11    | 0.01     | -0.46 | 0.04  | -0.11    | 1.00     |

#### Animal CTan-H-1

|          | $\beta$ | $\delta$ | $\alpha$ | $p$   | $c$   | $\sigma$ | $V_{i(}$ |
|----------|---------|----------|----------|-------|-------|----------|----------|
| $\beta$  | 1.00    | -0.13    | -0.40    | 0.03  | 0.25  | -0.32    | -0.03    |
| $\delta$ | -0.13   | 1.00     | 0.30     | -0.03 | -0.18 | -0.06    | 0.17     |
| $\alpha$ | -0.40   | 0.30     | 1.00     | -0.13 | 0.34  | 0.03     | 0.05     |
| $p$      | 0.03    | -0.03    | -0.13    | 1.00  | 0.00  | -0.07    | -0.04    |
| $c$      | 0.25    | -0.18    | 0.34     | 0.00  | 1.00  | -0.25    | 0.12     |

|           |       |       |      |       |       |       |       |
|-----------|-------|-------|------|-------|-------|-------|-------|
| $\sigma$  | -0.32 | -0.06 | 0.03 | -0.07 | -0.25 | 1.00  | -0.06 |
| $V_{i()}$ | -0.03 | 0.17  | 0.05 | -0.04 | 0.12  | -0.06 | 1.00  |

Animal CTan-H-2

|           | $\beta$ | $\delta$ | $\alpha$ | $p$   | $c$   | $\sigma$ | $V_{i()}$ |
|-----------|---------|----------|----------|-------|-------|----------|-----------|
| $\beta$   | 1.00    | -0.05    | -0.41    | -0.30 | 0.28  | -0.47    | -0.30     |
| $\delta$  | -0.05   | 1.00     | 0.01     | -0.05 | -0.30 | 0.19     | 0.02      |
| $\alpha$  | -0.41   | 0.01     | 1.00     | -0.06 | 0.17  | 0.26     | 0.10      |
| $p$       | -0.30   | -0.05    | -0.06    | 1.00  | 0.14  | -0.14    | 0.12      |
| $c$       | 0.28    | -0.30    | 0.17     | 0.14  | 1.00  | -0.53    | -0.08     |
| $\sigma$  | -0.47   | 0.19     | 0.26     | -0.14 | -0.53 | 1.00     | 0.14      |
| $V_{i()}$ | -0.30   | 0.02     | 0.10     | 0.12  | -0.08 | 0.14     | 1.00      |

Animal CTan-H-3

|           | $\beta$ | $\delta$ | $\alpha$ | $p$   | $c$   | $\sigma$ | $V_{i()}$ |
|-----------|---------|----------|----------|-------|-------|----------|-----------|
| $\beta$   | 1.00    | -0.07    | -0.39    | -0.27 | 0.45  | -0.43    | -0.26     |
| $\delta$  | -0.07   | 1.00     | 0.11     | -0.12 | -0.46 | 0.34     | 0.21      |
| $\alpha$  | -0.39   | 0.11     | 1.00     | 0.00  | 0.16  | 0.18     | 0.06      |
| $p$       | -0.27   | -0.12    | 0.00     | 1.00  | -0.09 | 0.03     | -0.04     |
| $c$       | 0.45    | -0.46    | 0.16     | -0.09 | 1.00  | -0.49    | -0.22     |
| $\sigma$  | -0.43   | 0.34     | 0.18     | 0.03  | -0.49 | 1.00     | 0.08      |
| $V_{i()}$ | -0.26   | 0.21     | 0.06     | -0.04 | -0.22 | 0.08     | 1.00      |
